# Supplementary material
Source: HighWire-hosted journal article supplement (https://sti.bmj.com/content/97/8/574)
Supplement: inline-supplementary-material-1 [file inline-supplementary-material-1.pdf]

# What do young people want from sexually transmitted infection testing services? A systematic review.

## Contents

|                                                                                                                            |    |
|----------------------------------------------------------------------------------------------------------------------------|----|
| Supplementary File 1. Search Strategy .....                                                                                | 2  |
| Supplementary File 2. PRISMA Checklist.....                                                                                | 5  |
| Supplementary File 3. PREFs Checklist .....                                                                                | 7  |
| Supplementary File 4. Supplementary Table 1: Preferable STI Testing Sites<br>Based on subpopulations of young people ..... | 8  |
| Supplementary File 5. Supplementary Table 2: Excluded studies.....                                                         | 16 |

## Supplementary File 1. Search Strategy

### 1. PUBMED

| Set | Search                                                                                                                                                                                                                                                                           | Results   |
|-----|----------------------------------------------------------------------------------------------------------------------------------------------------------------------------------------------------------------------------------------------------------------------------------|-----------|
| #1  | (STD OR STI OR HIV OR sexual health OR genitourinary) AND (service* OR test* OR diagnosis OR management OR treatment OR care) AND (prefer* OR satisfaction OR acceptability OR perspective* OR perception* OR qualitative OR value* OR experience*)                              | 155,079   |
| #2  | (((((sexually transmitted infection[MeSH Terms]) OR sexually transmitted disease[MeSH Terms]) AND (sexual health service[MeSH Terms]) OR health service)))                                                                                                                       | 2,513,004 |
| #3  | ((((((sexually transmitted disease[MeSH Terms]) OR STI) OR STD) OR Sexually transmitted infection[MeSH Terms])) AND (((((diagnosis[MeSH Terms]) OR service) OR Testing))) AND (((((Perspective) OR Perception) OR acceptability) OR Preference) OR Satisfaction) OR experience)) | 7998      |
| #4  | ((((((sexually transmitted disease[MeSH Terms]) OR STI) OR STD) OR Sexually transmitted infection[MeSH Terms])) AND (((((diagnosis[MeSH Terms]) OR service) OR Testing))) AND (((Perspective) OR Perception) OR acceptability)))                                                 | 342       |
| #5  | (((((sexually transmitted disease[MeSH Terms]) OR sexually transmitted infection[MeSH Terms]) OR STI) OR STD) AND Sexual health service[MeSH Terms]) AND internet[MeSH Terms]                                                                                                    | 342       |
| #6  | ((((((sexually transmitted disease[mesh terms]) or std or sexually transmitted infection[mesh terms]) or sti and health service) and preference)) and testing)                                                                                                                   | 216       |
| #7  | ((((((sexually transmitted disease[mesh terms]) or std or sexually transmitted infection[mesh terms]) or sti and sexual health service) and preference)) and testing)                                                                                                            | 213       |
| #8  | (((((sexually transmitted infection[MeSH Terms]) OR sexually transmitted disease[MeSH Terms]) AND patient preference[MeSH Terms]))                                                                                                                                               | 179       |
| #9  | ((((((sexually transmitted infection[MeSH Terms]) OR sexually transmitted disease[MeSH Terms]) AND sexual health service[MeSH Terms]))) AND preference                                                                                                                           | 135       |
| #10 | ((((((sexually transmitted disease[mesh terms]) or std or sexually transmitted infection[mesh terms]) or sti and sexual health service) and testing))) AND patient preference[MeSH Terms]                                                                                        | 70        |
| #11 | ((((((sexually transmitted disease[MeSH Terms]) OR sexually transmitted infection[MeSH Terms]) OR STI) OR STD) AND Sexual health service[MeSH Terms])) AND patient preference[MeSH Terms]                                                                                        | 48        |

### 2. EMBASE

| Set | Search | Results |
|-----|--------|---------|
|     |        |         |

|    |                                                                                                                                                                                                                                                       |        |
|----|-------------------------------------------------------------------------------------------------------------------------------------------------------------------------------------------------------------------------------------------------------|--------|
| #1 | ((STD or STI or HIV or sexual health or genitourinary) and (service* or test* or diagnosis or management or treatment or care) and (prefer* or satisfaction or acceptability or perspective* or perception* or qualit* or value* or experience*)).af. | 93,747 |
| #2 | ((Sexually transmitted infection or STI).kw. or STD.af. or Sexually transmitted disease.af.) and health service.af. and testing.af.                                                                                                                   | 1154   |
| #3 | (STD OR STI OR HIV OR sexual health OR genitourinary) AND (service* OR test* OR diagnosis OR management OR treatment OR care) AND (prefer* OR satisfaction OR acceptability OR perspective* OR perception* OR qualit* OR value* OR experience*).kw.   | 804    |
| #4 | ((Sexually transmitted infection or sexually transmitted disease).kw. or STI.af. or STD.af.) and testing.kw.                                                                                                                                          | 590    |
| #5 | ((Sexually transmitted infection or sexually transmitted disease).kw. or STI.af. or STD.af.) and internet.kw.                                                                                                                                         | 84     |

### 3. PsychINFO

| Set | Search                                                                                                                                                                                                                                                                | Results |
|-----|-----------------------------------------------------------------------------------------------------------------------------------------------------------------------------------------------------------------------------------------------------------------------|---------|
| #1  | ((STD or STI or HIV or sexual health or genitourinary) and (service* or test* or diagnosis or management or treatment or care) and (prefer* or satisfaction or acceptability or perspective* or perception* or qualit* or value* or experience*)).af.                 | 98,305  |
| #2  | (Sexually transmitted infection.mh. or STI.af. or sexually transmitted disease.mh. or STD.af.) and (testing.af. or diagnosis.af. or service.mh.) and (preference.mh. or perspective.af. or perception.af. or acceptability.af. or Satisfaction.af. or experience.af.) | 6186    |
| #3  | ((Sexually transmitted infection or sexually transmitted disease) and patient preferences).mh. and testing.af. and health service.mh.) or sexual health service.af.                                                                                                   | 163     |
| #4  | (Sexually transmitted infection.mh. or STI.af. or sexually transmitted disease.mh. or STD.af.) and patient preference.mh.                                                                                                                                             | 24      |
| #5  | ((Sexually transmitted infection or sexually transmitted disease) and patient preferences).mh. and testing.af. and health service.mh.) or sexual health service.af.                                                                                                   | 0       |
| #6  | (Sexually transmitted infection.mh. or STI.af. or sexually transmitted disease.mh. or STD.af.) and sexual health service.mh. and patient preference.af.                                                                                                               | 0       |

### 4. CINAHL

| Set | Search                                                                                                                                                                                                                                          | Results |
|-----|-------------------------------------------------------------------------------------------------------------------------------------------------------------------------------------------------------------------------------------------------|---------|
| #1  | (STD OR STI OR HIV OR sexual health OR genitourinary) AND (service* OR test* OR diagnosis OR management OR treatment OR care) AND (prefer* OR satisfaction OR acceptability OR perspective* OR perception* OR qualit* OR value* OR experience*) | 26,222  |
| #2  | sexually transmitted diseases OR MW sexually transmitted infections AND MW sexual health services AND MW patient preference AND MW testing                                                                                                      | 5421    |
| #3  | sexually transmitted diseases OR MW sexually transmitted infections AND MW sexual health services AND MW patient preference                                                                                                                     | 5421    |

|    |                                                                                                                                                                                                                                                                                    |     |
|----|------------------------------------------------------------------------------------------------------------------------------------------------------------------------------------------------------------------------------------------------------------------------------------|-----|
| #4 | (((((((sexually transmitted disease[MeSH Terms]) OR STI) OR STD) OR Sexually transmitted infection[MeSH Terms]))) AND (((((diagnosis[MeSH Terms]) OR service) OR Testing))) AND (((((Perspective) OR Perception) OR acceptability) OR Preference) OR Satisfaction) OR experience)) | 336 |
| #5 | (sexually transmitted diseases or sexually transmitted infections or sti or std ) AND MW patient preference AND MW sexual health services                                                                                                                                          | 0   |

## Supplementary File 2. PRISMA Checklist

| Section/topic                      | #  | Checklist item                                                                                                                                                                                                                                                                                              | Reported on page #   |
|------------------------------------|----|-------------------------------------------------------------------------------------------------------------------------------------------------------------------------------------------------------------------------------------------------------------------------------------------------------------|----------------------|
| <b>TITLE</b>                       |    |                                                                                                                                                                                                                                                                                                             |                      |
| Title                              | 1  | Identify the report as a systematic review, meta-analysis, or both.                                                                                                                                                                                                                                         | 1                    |
| <b>ABSTRACT</b>                    |    |                                                                                                                                                                                                                                                                                                             |                      |
| Structured summary                 | 2  | Provide a structured summary including, as applicable: background; objectives; data sources; study eligibility criteria, participants, and interventions; study appraisal and synthesis methods; results; limitations; conclusions and implications of key findings; systematic review registration number. | 2                    |
| <b>INTRODUCTION</b>                |    |                                                                                                                                                                                                                                                                                                             |                      |
| Rationale                          | 3  | Describe the rationale for the review in the context of what is already known.                                                                                                                                                                                                                              | 3                    |
| Objectives                         | 4  | Provide an explicit statement of questions being addressed with reference to participants, interventions, comparisons, outcomes, and study design (PICOS).                                                                                                                                                  | 3                    |
| <b>METHODS</b>                     |    |                                                                                                                                                                                                                                                                                                             |                      |
| Protocol and registration          | 5  | Indicate if a review protocol exists, if and where it can be accessed (e.g., Web address), and, if available, provide registration information including registration number.                                                                                                                               | 5                    |
| Eligibility criteria               | 6  | Specify study characteristics (e.g., PICOS, length of follow-up) and report characteristics (e.g., years considered, language, publication status) used as criteria for eligibility, giving rationale.                                                                                                      | 5-6                  |
| Information sources                | 7  | Describe all information sources (e.g., databases with dates of coverage, contact with study authors to identify additional studies) in the search and date last searched.                                                                                                                                  | 5-6                  |
| Search                             | 8  | Present full electronic search strategy for at least one database, including any limits used, such that it could be repeated.                                                                                                                                                                               | Supplementary file 1 |
| Study selection                    | 9  | State the process for selecting studies (i.e., screening, eligibility, included in systematic review, and, if applicable, included in the meta-analysis).                                                                                                                                                   | 5                    |
| Data collection process            | 10 | Describe method of data extraction from reports (e.g., piloted forms, independently, in duplicate) and any processes for obtaining and confirming data from investigators.                                                                                                                                  | 6                    |
| Data items                         | 11 | List and define all variables for which data were sought (e.g., PICOS, funding sources) and any assumptions and simplifications made.                                                                                                                                                                       | N/A                  |
| Risk of bias in individual studies | 12 | Describe methods used for assessing risk of bias of individual studies (including specification of whether this was done at the study or outcome level), and how this information is to be used in any data synthesis.                                                                                      | Supplementary file 3 |

|                               |    |                                                                                                                                                                                                          |                      |
|-------------------------------|----|----------------------------------------------------------------------------------------------------------------------------------------------------------------------------------------------------------|----------------------|
| Summary measures              | 13 | State the principal summary measures (e.g., risk ratio, difference in means).                                                                                                                            | N/A                  |
| Synthesis of results          | 14 | Describe the methods of handling data and combining results of studies, if done, including measures of consistency (e.g., I <sup>2</sup> ) for each meta-analysis.                                       | N/A                  |
| Risk of bias across studies   | 15 | Specify any assessment of risk of bias that may affect the cumulative evidence (e.g., publication bias, selective reporting within studies).                                                             | N/A                  |
| Additional analyses           | 16 | Describe methods of additional analyses (e.g., sensitivity or subgroup analyses, meta-regression), if done, indicating which were pre-specified.                                                         | N/A                  |
| <b>RESULTS</b>                |    |                                                                                                                                                                                                          |                      |
| Study selection               | 17 | Give numbers of studies screened, assessed for eligibility, and included in the review, with reasons for exclusions at each stage, ideally with a flow diagram.                                          | 5-6                  |
| Study characteristics         | 18 | For each study, present characteristics for which data were extracted (e.g., study size, PICOS, follow-up period) and provide the citations.                                                             | 5-6                  |
| Risk of bias within studies   | 19 | Present data on risk of bias of each study and, if available, any outcome level assessment (see item 12).                                                                                                | Supplementary file 3 |
| Results of individual studies | 20 | For all outcomes considered (benefits or harms), present, for each study: (a) simple summary data for each intervention group (b) effect estimates and confidence intervals, ideally with a forest plot. | N/A                  |
| Synthesis of results          | 21 | Present results of each meta-analysis done, including confidence intervals and measures of consistency.                                                                                                  | N/A                  |
| Risk of bias across studies   | 22 | Present results of any assessment of risk of bias across studies (see Item 15).                                                                                                                          | N/A                  |
| Additional analysis           | 23 | Give results of additional analyses, if done (e.g., sensitivity or subgroup analyses, meta-regression [see Item 16]).                                                                                    | N/A                  |
| <b>DISCUSSION</b>             |    |                                                                                                                                                                                                          |                      |
| Summary of evidence           | 24 | Summarize the main findings including the strength of evidence for each main outcome; consider their relevance to key groups (e.g., healthcare providers, users, and policy makers).                     | 18-22                |
| Limitations                   | 25 | Discuss limitations at study and outcome level (e.g., risk of bias), and at review-level (e.g., incomplete retrieval of identified research, reporting bias).                                            | 21-22                |
| Conclusions                   | 26 | Provide a general interpretation of the results in the context of other evidence, and implications for future research.                                                                                  | 18-22                |
| <b>FUNDING</b>                |    |                                                                                                                                                                                                          |                      |
| Funding                       | 27 | Describe sources of funding for the systematic review and other support (e.g., supply of data); role of funders for the systematic review.                                                               | 22                   |

## Supplementary File 3. PREFs Checklist

| Study                 | (1) Purpose: Is the purpose of the study in relation to preferences clearly stated? | (2) Respondents: Are the non-responders similar to the non-responders? | (3) Explanation: Are methods of assessing preferences clearly explained? | (4) Findings: Were all respondents included in the reported findings and analysis of preference results? | (5) Significance: Were significance tests used to assess the preference results? | Score (/_/5) |
|-----------------------|-------------------------------------------------------------------------------------|------------------------------------------------------------------------|--------------------------------------------------------------------------|----------------------------------------------------------------------------------------------------------|----------------------------------------------------------------------------------|--------------|
| Aicken(40)            | 1                                                                                   | 0                                                                      | 1                                                                        | 1                                                                                                        | 0                                                                                | 3            |
| Balfe(7)              | 1                                                                                   | 0                                                                      | 1                                                                        | 1                                                                                                        | 0                                                                                | 3            |
| Balfe(41)             | 1                                                                                   | 0                                                                      | 1                                                                        | 1                                                                                                        | 0                                                                                | 3            |
| Barnard(58)           | 1                                                                                   | 0                                                                      | 1                                                                        | 1                                                                                                        | 1                                                                                | 4            |
| Baytop(37)            | 1                                                                                   | 0                                                                      | 1                                                                        | 1                                                                                                        | 1                                                                                | 4            |
| Brown(45)             | 1                                                                                   | 0                                                                      | 1                                                                        | 0                                                                                                        | 1                                                                                | 3            |
| Brugha(47)            | 1                                                                                   | 0                                                                      | 1                                                                        | 1                                                                                                        | 1                                                                                | 4            |
| Brugha(46)            | 1                                                                                   | 0                                                                      | 1                                                                        | 1                                                                                                        | 1                                                                                | 4            |
| Cohall(27)            | 1                                                                                   | 0                                                                      | 1                                                                        | 1                                                                                                        | 1                                                                                | 4            |
| Cuffe(38)             | 1                                                                                   | 0                                                                      | 1                                                                        | 1                                                                                                        | 1                                                                                | 4            |
| Datta(5)              | 1                                                                                   | 0                                                                      | 1                                                                        | 1                                                                                                        | 0                                                                                | 3            |
| Denison(4)            | 1                                                                                   | 0                                                                      | 1                                                                        | 1                                                                                                        | 0                                                                                | 3            |
| Denison(19)           | 1                                                                                   | 0                                                                      | 1                                                                        | 1                                                                                                        | 0                                                                                | 3            |
| Eaton(75)             | 1                                                                                   | 0                                                                      | 1                                                                        | 1                                                                                                        | 0                                                                                | 3            |
| Feinstein(34)         | 1                                                                                   | 0                                                                      | 1                                                                        | 1                                                                                                        | 0                                                                                | 3            |
| Fielder(71)           | 1                                                                                   | 0                                                                      | 1                                                                        | 1                                                                                                        | 0                                                                                | 3            |
| Fields(26)            | 1                                                                                   | 0                                                                      | 1                                                                        | 1                                                                                                        | 0                                                                                | 3            |
| Frye(10)              | 1                                                                                   | 0                                                                      | 1                                                                        | 1                                                                                                        | 0                                                                                | 3            |
| Gkatzidou(57)         | 1                                                                                   | 0                                                                      | 1                                                                        | 1                                                                                                        | 0                                                                                | 3            |
| Gray(48)              | 1                                                                                   | 0                                                                      | 1                                                                        | 1                                                                                                        | 1                                                                                | 4            |
| Habel(72)             | 1                                                                                   | 0                                                                      | 1                                                                        | 0                                                                                                        | 0                                                                                | 1            |
| Hagley(49)            | 1                                                                                   | 0                                                                      | 1                                                                        | 1                                                                                                        | 0                                                                                | 3            |
| Harb(59)              | 1                                                                                   | 0                                                                      | 1                                                                        | 0                                                                                                        | 1                                                                                | 3            |
| Hayter(54)            | 0                                                                                   | 0                                                                      | 1                                                                        | 0                                                                                                        | 0                                                                                | 1            |
| Hogan(6)              | 1                                                                                   | 0                                                                      | 1                                                                        | 1                                                                                                        | 0                                                                                | 3            |
| Holloway(73)          | 1                                                                                   | 0                                                                      | 1                                                                        | 0                                                                                                        | 0                                                                                | 2            |
| Ingram(56)            | 1                                                                                   | 0                                                                      | 1                                                                        | 0                                                                                                        | 0                                                                                | 2            |
| Jerome(52)            | 1                                                                                   | 0                                                                      | 1                                                                        | 1                                                                                                        | 0                                                                                | 3            |
| Johnston(8)           | 1                                                                                   | 0                                                                      | 1                                                                        | 0                                                                                                        | 0                                                                                | 2            |
| Kowalczyk Mullins(29) | 1                                                                                   | 0                                                                      | 1                                                                        | 0                                                                                                        | 1                                                                                | 3            |
| Labacher(64)          | 1                                                                                   | 0                                                                      | 1                                                                        | 0                                                                                                        | 1                                                                                | 3            |
| Llewellyn(50)         | 1                                                                                   | 0                                                                      | 1                                                                        | 0                                                                                                        | 1                                                                                | 3            |
| Lorimer(43)           | 1                                                                                   | 0                                                                      | 1                                                                        | 1                                                                                                        | 0                                                                                | 2            |

|                 |   |   |   |   |   |   |
|-----------------|---|---|---|---|---|---|
| Martin(68)      | 1 | 0 | 1 | 0 | 1 | 3 |
| Masaro(61)      | 0 | 0 | 1 | 1 | 0 | 2 |
| McRee(74)       | 1 | 0 | 1 | 0 | 1 | 3 |
| Merchant(28)    | 1 | 0 | 1 | 1 | 1 | 4 |
| Normansell(44)  | 1 | 0 | 1 | 1 | 0 | 3 |
| Peralta(30)     | 1 | 0 | 1 | 1 | 1 | 4 |
| Perry(31)       | 1 | 0 | 1 | 1 | 0 | 3 |
| Phillips(9)     | 1 | 0 | 1 | 1 | 1 | 4 |
| Pickett(32)     | 1 | 0 | 1 | 1 | 0 | 3 |
| Saadatmand(33)  | 1 | 0 | 1 | 1 | 0 | 3 |
| Sharma(39)      | 1 | 0 | 1 | 1 | 1 | 4 |
| Shoveller(62)   | 1 | 0 | 1 | 1 | 0 | 3 |
| Shoveller(63)   | 1 | 0 | 1 | 1 | 0 | 3 |
| Smith(70)       | 1 | 0 | 1 | 1 | 1 | 4 |
| Tebb(35)        | 1 | 0 | 1 | 1 | 1 | 4 |
| Thomas(51)      | 1 | 0 | 1 | 1 | 0 | 3 |
| Tomnay(20)      | 1 | 0 | 1 | 1 | 0 | 3 |
| Wilson(60)      | 1 | 0 | 1 | 0 | 1 | 3 |
| Wong(11)        | 0 | 0 | 1 | 1 | 0 | 2 |
| Eaton(36)       | 1 | 0 | 1 | 1 | 1 | 4 |
| Jones(42)       | 1 | 0 | 1 | 1 | 0 | 3 |
| Heritage(55)    | 1 | 0 | 1 | 1 | 0 | 3 |
| Ewert(65)       | 1 | 0 | 1 | 1 | 0 | 3 |
| Macphail(67)    | 1 | 0 | 1 | 1 | 0 | 3 |
| Santer(21)      | 1 | 0 | 1 | 1 | 0 | 3 |
| Zakher(69)      | 1 | 0 | 1 | 1 | 0 | 3 |
| Pavlin(66)      | 1 | 0 | 1 | 1 | 0 | 3 |
| Van Rooijen(76) | 1 | 0 | 1 | 1 | 1 | 4 |
| Miners(53)      | 1 | 0 | 1 | 1 | 1 | 4 |
| Balfe(12)       | 1 | 0 | 1 | 1 | 0 | 3 |

Study listed by first author's surname

#### Supplementary File 4. Supplementary Table 1: Preferable STI Testing Sites Based on subpopulations of young people

| Study              | Risk Group | Year of Study | Country     | Setting                                                                                                        | Service Preference  |
|--------------------|------------|---------------|-------------|----------------------------------------------------------------------------------------------------------------|---------------------|
| Van Rooijen (2016) | < 25 y/o   | 2012-2013     | Netherlands | Low risk heterosexual persons                                                                                  | Home Collection Kit |
| Aicken (2016)      | 16-24 y/o  | Pub. 2016     | England     | Students from further education colleges located in an area of high STI prevalence. An ethnic minority groups. | Online              |
| Barnard (2018)     | 16-20 y/o  | 2016          | England     | Residents of an ethnically diverse suburb with a high STI prevalence                                           | Clinic/GP           |
| Gray (2009)        | 16-25 y/o  | 2007          | England     | Convenience sample                                                                                             | GP                  |



|                   |                              |           |           |                                                                                                         |                            |
|-------------------|------------------------------|-----------|-----------|---------------------------------------------------------------------------------------------------------|----------------------------|
| Harb (2020)       | 15-24y/o                     | 2013-2016 | England   | Data from the Chlamydia surveillance system                                                             | Clinic/GP                  |
| Hogan (2010)      | 15-24y/o                     | 2007-2008 | England   | Recruited from a mix of high screening and low screening GP clinics                                     | Clinic/GP                  |
| Jerome (2009)     | 12-24y/o                     | 2007      | UK        | From a local medical practice or local school or the Youth Information Shop                             | Clinic (walk-in)           |
| Shoveller (2012)  | 15-24y/o                     | Pub. 2012 | Canada    | Metropolitan Vancouver                                                                                  | Online                     |
| Tebb (2004)       | 13-20y/o                     | 1999-2000 | US        | Ethnically diverse sample                                                                               | Home Testing               |
| Tomnay (2014)     | 16-25y/o                     | 2012      | Australia | Rural community sporting clubs                                                                          | Online                     |
| Eaton (2019)      | 16-24y/o                     | Pub. 2019 | England   | Data from online national panel                                                                         | Online                     |
| Jones (2017)      | 16-24y/o                     | 2013      | England   | Recruited from various backgrounds of including rural, city, ethnic backgrounds & levels of deprivation | GP                         |
| Barnard (2018)    | 20-25y/o                     | 2016      | England   | Residents of an ethnically diverse suburb with a high STI prevalence                                    | Online                     |
| Smith (2016)      | <30y/o                       | 2011-2013 | Australia | RCT of 200 Women, 200 heterosexual men and 200 MSM – previous diagnosis of chlamydia                    | Home Testing               |
| Barnard (2018)    | Homosexual & bisexual        | 2016      | England   | Residents of an ethnically diverse suburb with a high STI prevalence                                    | Online                     |
| Feinstein (2018)  | YMSM (18-29y/o)              | 2013      | US        | Previously tested positive for STIs (Cis-gendered).                                                     | Clinic/GP                  |
| Baytop (2014)     | YBMSM                        | 2008-2010 | US        | CBO serving AA                                                                                          | Clinic (walk-in)           |
| Eaton (2018)      | YBMSM (16-25y/o)             | 2017-2018 | US        | YBMSM living in the Deep South                                                                          | Clinic                     |
| Sharma (2019)     | Transgender (15-24y/o)       | 2017-2018 | US        | Self-identifying as non-cisgender, never having been diagnosed with HIV, with access to the internet    | Clinic                     |
| Phillips (2019)   | YMSM & Transgender           | 2015      | US        | YMSM and AMAB transgender individuals in Chicago                                                        | Clinic/CBOs/health centres |
| Barnard (2018)    | White British                | 2016      | England   | Residents of an ethnically diverse suburb with a high STI prevalence                                    | Online                     |
| Saadatmand (2012) | Young Black Men              | 2010      | US        | Recruited participants living in a highly disadvantaged neighbourhood of San Francisco                  | Clinic/GP                  |
| Barnard (2018)    | Young Black Men              | 2016      | England   | Residents of an ethnically diverse suburb with a high STI prevalence                                    | Clinic                     |
| Barnard (2018)    | Previously positive for STIs | 2016      | England   | Residents of an ethnically diverse suburb with a high STI prevalence                                    | Clinic                     |
| Balfe (2010)      | Young women (18-29y/o)       | Pub. 2010 | Ireland   | Community healthcare (Rural + Urban)                                                                    | GP                         |
| Brugha (2011)     | Young women (18-29y/o)       | 2009      | Ireland   | Mixed locations: CBO, GUM clinic and higher education institutions                                      | Speciality clinics/GPs     |

GP, General Practice; GUM, Genitourinary Medicine; CBO, Community Based Organisation; AA, Alcoholics Anonymous; UK, United Kingdom; US, United States; MSM, Men who have Sex with Men; YMSM, Young Men who have Sex with Men; YBMSM, Young Black Men who have Sex with Men; STI, Sexually Transmitted Infection; HIV, Human Immunodeficiency Virus; AMAB, Assigned Male at Birth. Highlighted rows are subpopulations that preferred clinic appointments.

## Supplementary File 5. Supplementary Table 2: Excluded studies

Supplementary table 2: Excluded studies in what do young people want from sexually transmitted infection testing services? A systematic review.

| Authors             | Study title                                                                                                                                                                                                                        | Year of Publication | Reason for exclusion       |
|---------------------|------------------------------------------------------------------------------------------------------------------------------------------------------------------------------------------------------------------------------------|---------------------|----------------------------|
| O Peter et al.      | <i>Understanding attitudes, barriers and challenges in a small island nation to disease and partner notification for HIV and other sexually transmitted infections: a qualitative study</i>                                        | 2015                | Not key population         |
| Aicken et al.       | <i>Barriers and opportunities for evidence-based health service planning: the example of developing a Decision Analytic Model to plan services for sexually transmitted infections in the UK</i>                                   | 2012                | Not related to preferences |
| Alli et al.         | <i>Interpersonal Relations Between Health Care Workers and Young Clients: Barriers to Accessing Sexual and Reproductive Health Care</i>                                                                                            | 2013                | Not high income country    |
| Amyai et al.        | <i>A prospective multicentre study of healthcare provider preference in rapid HIV testing kits: Determine versus INSTI.</i>                                                                                                        | 2018                | Not key population         |
| Anderson et al.     | <i>Man Up Monday: An integrated public health approach to increase sexually transmitted infection awareness and testing among male students at a midwest university</i>                                                            | 2016                | Not related to preferences |
| Arya et al.         | <i>African-American patients' preferences for a health center campaign promoting HIV testing: an exploratory study and future directions.</i>                                                                                      | 2014                | Not related to preferences |
| Baraitser et al.    | <i>User preference for HIV self-testing or self-sampling within a free online sexual health service: a service evaluation</i>                                                                                                      | 2019                | Not key population         |
| Bartelsman et al.   | <i>HIV testing week 2015: lowering barriers for HIV testing among high-risk groups in Amsterdam</i>                                                                                                                                | 2017                | Not related to preferences |
| Bauermeister et al. | <i>The Use of Mystery Shopping for Quality Assurance Evaluations of HIV/STI Testing Sites Offering Services to Young Gay and Bisexual Men</i>                                                                                      | 2015                | Not related to preferences |
| Bell et al.         | <i>Delivery of HIV test results, post-test discussion and referral in health care settings: A review of guidance for European countries</i>                                                                                        | 2015                | Not primary data           |
| Bender et al.       | <i>Content analysis: A review of perceived barriers to sexual and reproductive health services by young people</i>                                                                                                                 | 2013                | Not primary data           |
| Bennett et al.      | <i>An alternative model of sexually transmissible infection testing in men attending a sex-on-premises venue in Sydney: A cross-sectional descriptive study</i>                                                                    | 2016                | Not key population         |
| Biggs et al.        | <i>Why not the GP? Client preferences for sexually transmissible infection testing in Western Sydney</i>                                                                                                                           | 2015                | Not key population         |
| Bil et al.          | <i>Usage of purchased self-tests for HIV and sexually transmitted infections in Amsterdam, the Netherlands: Results of population-based and serial cross-sectional studies among the general population and sexual risk groups</i> | 2017                | Not key population         |
| Binson et al.       | <i>Bringing HIV/STI testing programmes to high-risk men</i>                                                                                                                                                                        | 2005                | Not related to preferences |

|                   |                                                                                                                                                                                                 |      |                            |
|-------------------|-------------------------------------------------------------------------------------------------------------------------------------------------------------------------------------------------|------|----------------------------|
| Bissell           | <i>Chlamydia screening programs: a review of the literature. Part 2: testing procedures and educational interventions for primary care physicians</i>                                           | 2019 | Not primary data           |
| Botfield et al.   | <i>Drawing them in: Professional perspectives on the complexities of engaging 'culturally diverse' young people with sexual and reproductive health promotion and care in Sydney, Australia</i> | 2017 | Not related to preferences |
| Boyle             | <i>Automation of community-based HIV and STI testing service</i>                                                                                                                                | 2017 | Not key population         |
| Brennan et al.    | <i>Online Outreach Services Among Men Who Use the Internet to Seek Sex With Other Men (MISM) in Ontario, Canada: An Online Survey</i>                                                           | 2015 | Not related to preferences |
| Brown et al.      | <i>Pilot evaluation of a web-based intervention targeting sexual health service access</i>                                                                                                      | 2016 | Not related to preferences |
| Burchell et al.   | <i>Community-Directed Bacterial Sexually Transmitted Infection Testing Interventions Among Men Who Have Sex With Men: Protocol for an E-Delphi Study in Toronto, Canada</i>                     | 2019 | Not key population         |
| Carey et al.      | <i>Improving HIV Rapid Testing Rates Among STD Clinic Patients: A Randomized Controlled Trial</i>                                                                                               | 2008 | Not related to preferences |
| Carmine et al.    | <i>Testing and treatment for sexually transmitted infections in adolescents-what's new?</i>                                                                                                     | 2014 | Not related to preferences |
| Chabot C et al.   | <i>Anticipating the potential for positive uptake and adaptation in the implementation of a publicly funded online STBBI testing service: a qualitative analysis</i>                            | 2018 | Not related to preferences |
| Chacko et al.     | <i>Feasibility of providing sexually transmitted infection testing and treatment in off-campus, nonclinic settings for adolescents enrolled in a school-based research project</i>              | 2014 | Not related to preferences |
| Challenor et al.  | <i>Something for the weekend! Saturday services - what do patients want and what do they need?</i>                                                                                              | 2010 | Not key population         |
| Clifton et al.    | <i>Patterns of chlamydia testing in different settings and implications for wider STI diagnosis and care: A probability sample survey of the British population</i>                             | 2017 | Not related to preferences |
| Coenen et al.     | <i>Optimal HIV testing and earlier care: The way forward in Europe</i>                                                                                                                          | 2008 | Not primary data           |
| Cohen et al.      | <i>Time to use text reminders in genitourinary medicine clinics</i>                                                                                                                             | 2008 | Not key population         |
| Cohen et al.      | <i>Screening for sexually transmitted diseases in non-traditional settings: a personal view</i>                                                                                                 | 2005 | Not primary data           |
| Collins et al.    | <i>The "No Wrong Door" Approach to HIV Testing: Results From a Statewide Retail Pharmacy-Based HIV Testing Program in Virginia, 2014-2016</i>                                                   | 2018 | Not related to preferences |
| Collister et al.  | <i>Can an asymptomatic screening pathway for men who have sex with men be introduced safely at a level 3 sexual health service in the UK?</i>                                                   | 2015 | Not related to preferences |
| Conway et al.     | <i>Effect of testing experience and profession on provider acceptability of rapid HIV testing after implementation in public sexual health clinics in Sydney</i>                                | 2015 | Not key population         |
| Conway et al.     | <i>Providing HIV-negative results to low-risk clients by telephone</i>                                                                                                                          | 2012 | Not key population         |
| Cunningham et al. | <i>Relationships between perceived STD-related stigma, STD-related shame and STD screening among a household sample of adolescents</i>                                                          | 2009 | Not related to preferences |
| Dave et al.       | <i>The need for innovative sexually transmitted infection screening initiatives for young men: Evidence from genitourinary medicine clinics across England</i>                                  | 2011 | Not related to preferences |
| Davide et al.     | <i>Patients' Willingness to Participate in Rapid HIV Testing: A pilot study in three New York City dental hygiene clinics</i>                                                                   | 2017 | Not key population         |
| Debattista et al. | <i>A trial of pharmacy-based testing for Chlamydia trachomatis using postal specimen kits</i>                                                                                                   | 2017 | Not related to preferences |
| Dhar et al.       | <i>Texting--a revolution in sexual health communication</i>                                                                                                                                     | 2006 | Full text not available    |

|                    |                                                                                                                                                                                                                                      |      |                            |
|--------------------|--------------------------------------------------------------------------------------------------------------------------------------------------------------------------------------------------------------------------------------|------|----------------------------|
| Dias et al.        | <i>Perspectives of African and Brazilian immigrant women on sexual and reproductive health</i>                                                                                                                                       | 2010 | Not high-income country    |
| Doshi et al.       | <i>Health Care and HIV Testing Experiences Among Black Men in the South: Implications for 'Seek, Test, Treat, and Retain' HIV Prevention Strategies</i>                                                                              | 2013 | Not key population         |
| Erbelding et al.   | <i>Following-up for HIV test results: What limits return in an STD clinic population?</i>                                                                                                                                            | 2004 | Not related to preferences |
| Evans-Jones et al. | <i>Use of Telephonetics(R) RESULTS(TM) computer-facilitated telephone system with automatic results upload</i>                                                                                                                       | 2011 | Not related to preferences |
| Fair et al.        | <i>Self-reported sexual and reproductive health information/services received by adolescents and young adults with perinatally acquired HIV: what are their needs?</i>                                                               | 2016 | Not related to preferences |
| Fernando et al.    | <i>Genitourinary medicine clinic and general practitioner contact: what do patients want?</i>                                                                                                                                        | 2008 | Not key population         |
| Fernando et al.    | <i>Testing times: testing patient acceptance and ability to self-screen for a No-Talk Testing service</i>                                                                                                                            | 2013 | Not key population         |
| Frankis et al.     | <i>Regular STI testing amongst men who have sex with men and use social media is suboptimal - a cross-sectional study</i>                                                                                                            | 2016 | Not related to preferences |
| Gamble et al.      | <i>Design of the HPTN 065 (TLC-Plus) study: A study to evaluate the feasibility of an enhanced test, link-to-care, plus treat approach for HIV prevention in the United States</i>                                                   | 2017 | Not key population         |
| Gaydos et al.      | <i>Characteristics and predictors of women who obtain rescreening for sexually transmitted infections using the www.iwanthekit.org screening programme</i>                                                                           | 2013 | Not related to preferences |
| Gibbs et al.       | <i>Mixed-methods evaluation of a novel online STI results service</i>                                                                                                                                                                | 2017 | Not key population         |
| Gilbert et al.     | <i>Click yes to consent: Acceptability of incorporating informed consent into an internet-based testing program for sexually transmitted and blood-borne infections</i>                                                              | 2017 | Not related to preferences |
| Gilbert et al.     | <i>A cohort study comparing rate of repeat testing for sexually transmitted and blood-borne infections between clients of an internet-based testing programme and of sexually transmitted infection clinics in Vancouver, Canada</i> | 2019 | Not related to preferences |
| Goldenberg et al.  | <i>Barriers to STI testing among youth in a Canadian oil and gas community</i>                                                                                                                                                       | 2007 | Not related to preferences |
| Graseck et al.     | <i>Home screening compared with clinic-based screening for sexually transmitted infections</i>                                                                                                                                       | 2010 | Not related to preferences |
| Green et al.       | <i>Advantages and disadvantages for receiving Internet-based HIV/AIDS interventions at home or at community-based organizations</i>                                                                                                  | 2015 | Not key population         |
| Grieb et al.       | <i>Identifying solutions to improve the sexually transmitted infections testing experience for youth through participatory ideation</i>                                                                                              | 2018 | Not related to preferences |
| Gursahaney et al.  | <i>Partner notification of sexually transmitted diseases: practices and preferences</i>                                                                                                                                              | 2011 | Not key population         |
| Hall et al.        | <i>A population-based study of US women's preferred versus usual sources of reproductive health care</i>                                                                                                                             | 2015 | Not key population         |
| Hambly et al.      | <i>Sexual health services--a patient preference survey</i>                                                                                                                                                                           | 2006 | Not key population         |
| Heller et al.      | <i>Factors associated with a clinician's offer of screening HIV-positive patients for sexually transmitted infections, including syphilis</i>                                                                                        | 2011 | Not related to preferences |
| Hengel et al.      | <i>Perspectives of primary health care staff on the implementation of a sexual health quality improvement program: a qualitative study in remote aboriginal communities in Australia</i>                                             | 2018 | Not key population         |
| Hitchings et al.   | <i>What do patients want most from sexual health services?</i>                                                                                                                                                                       | 2009 | Not key population         |

|                    |                                                                                                                                                                                   |      |                            |
|--------------------|-----------------------------------------------------------------------------------------------------------------------------------------------------------------------------------|------|----------------------------|
| Hocking et al.     | <i>Population effectiveness of opportunistic chlamydia testing in primary care in Australia: A cluster-randomised controlled trial</i>                                            | 2018 | Not related to preferences |
| Howard et al.      | <i>Patient preference for patient-delivered partner therapy: exploratory findings from three sexually transmitted disease clinics</i>                                             | 2011 | Not key population         |
| Howard et al.      | <i>Screening methods for Chlamydia trachomatis and Neisseria gonorrhoeae infections in sexually transmitted infection clinics: what do patients prefer?</i>                       | 2010 | Not key population         |
| Hubach et al.      | <i>Preferred methods of sexually transmitted infection service delivery among an urban sample of underserved midwestern men</i>                                                   | 2014 | Not key population         |
| Jones et al.       | <i>Women's preferences for testing and management of sexually transmitted infections among low-income New York City family planning clients</i>                                   | 2013 | Not key population         |
| Jones et al.       | <i>eTriage--a novel, web-based triage and booking service: enabling timely access to sexual health clinics</i>                                                                    | 2010 | Not related to preferences |
| Kang et al.        | <i>Interventions for young people in Australia to reduce HIV and sexually transmissible infections: A systematic review</i>                                                       | 2010 | Not primary data           |
| Kassler et al.     | <i>On-site, rapid HIV testing with same-day results and counseling</i>                                                                                                            | 1997 | Published prior to 2000    |
| Kellerman et al.   | <i>HIV testing within at-risk populations in the United States and the reasons for seeking or avoiding HIV testing</i>                                                            | 2002 | Not related to preferences |
| Kendrick et al.    | <i>Outcomes of offering rapid point-of-care HIV testing in a sexually transmitted disease clinic</i>                                                                              | 2005 | Not related to preferences |
| Kiene et al.       | <i>Provider-initiated HIV testing in health care settings: Should it include client-centered counselling?</i>                                                                     | 2009 | Not key population         |
| Kinsler et al.     | <i>Preference for physician vs. nurse-initiated opt-out screening on HIV test acceptance</i>                                                                                      | 2013 | Not key population         |
| Kodama et al.      | <i>Factors affecting appropriate management of patients with sexually transmitted infections in Japan</i>                                                                         | 2010 | Not related to preferences |
| Leber et al.       | <i>Effectiveness and cost-effectiveness of implementing HIV testing in primary care in East London: Protocol for an interrupted time series analysis</i>                          | 2017 | Not related to preferences |
| Lee et al.         | <i>Access to sexual health advice using an automated, internet-based risk assessment service</i>                                                                                  | 2009 | Not related to preferences |
| Liuccio et al.     | <i>Web-based institutional health promotion initiatives for young people: The 'Chiediloqui' project</i>                                                                           | 2016 | Not related to STI testing |
| McRee et al.       | <i>Access of non-specialist sexual health services by men who have sex with men: Do they differ from those attending specialist services?</i>                                     | 2018 | Not related to preferences |
| Melville et al.    | <i>Client perspectives on sexual health service provision</i>                                                                                                                     | 2004 | Full text not available    |
| Mercer et al.      | <i>Not so different after all? Comparing patients attending general practice-based locally enhanced services for sexual health with patients attending genitourinary medicine</i> | 2013 | Not key population         |
| Mevisen et al.     | <i>Development of Long Live Love +, a school-based online sexual health programme for young adults. An intervention mapping approach</i>                                          | 2017 | Not related to preferences |
| Nadarzynski et al. | <i>Preferences for the format of text messages containing results of online screening for sexually transmitted infections: a service evaluation</i>                               | 2018 | Not key population         |
| P O'Byrne et al.   | <i>"Express testing" in STI clinics: extant literature and preliminary implementation data</i>                                                                                    | 2016 | No primary data            |

|                       |                                                                                                                                                                                                                                      |      |                                                |
|-----------------------|--------------------------------------------------------------------------------------------------------------------------------------------------------------------------------------------------------------------------------------|------|------------------------------------------------|
| Odesanmi et al.       | <i>Comparative effectiveness and acceptability of home-based and clinic-based sampling methods for sexually transmissible infections screening in females aged 14-50 years: a systematic review and meta-analysis</i>                | 2013 | No primary data                                |
| Oliveira et al.       | <i>Health Services For Lesbians, Gays, Bisexuals And Transvestites / Transexuals</i>                                                                                                                                                 | 2018 | Not related to preferences                     |
| Pai et al.            | <i>Will a quadruple multiplexed point-of-care screening strategy for HIV-related co-infections be feasible and impact detection of new co-infections in at-risk populations? Results from cross-sectional studies</i>                | 2014 | Not data on key populations                    |
| Pai et al.            | <i>Supervised and unsupervised self-testing for HIV in high- and low-risk populations: a systematic review</i>                                                                                                                       | 2013 | No primary data                                |
| Patel et al.          | <i>Improving sexual health services in the city: can the NHS learn from clients and the service industry</i>                                                                                                                         | 2007 | Not related to preferences (of key population) |
| Pendleton et al.      | <i>Teens in the twenty-first century still prefer people over machines: importance of intervention delivery style in adolescent HIV/STD prevention</i>                                                                               | 2008 | not related to testing                         |
| Phillips et al.       | <i>Test n Treat (TnT): a cluster-randomised feasibility trial of frequent, rapid-testing and same-day, on-site treatment to reduce rates of chlamydia in high-risk further education college students: statistical analysis plan</i> | 2018 | Study not completed                            |
| Read et al.           | <i>Adolescent patient preferences surrounding partner notification and treatment for sexually transmitted infections</i>                                                                                                             | 2014 | Not related to preferences                     |
| Mimiaga et al.        | <i>A Mixed Methods Study of the Sexual Health Needs of New England Transmen Who Have Sex with Nontransgender Men</i>                                                                                                                 | 2010 | Not related to preferences                     |
| Reynolds et al.       | <i>You've got mail (and an STI)</i>                                                                                                                                                                                                  | 2015 | No primary data                                |
| Robards et al.        | <i>How marginalized young people access, engage with, and navigate health-care systems in the digital age: Systematic review</i>                                                                                                     | 2018 | No primary data                                |
| Rodriguez-Hart et al. | <i>Just text me! Texting sexually transmitted disease clients their test results in Florida, February 2012-January 2013</i>                                                                                                          | 2015 | Not key population                             |
| Rogstad et al.        | <i>Sexual health needs of the under-16s attending an STI clinic: What are they and are they being addressed?</i>                                                                                                                     | 2003 | Not related to preferences                     |
| Ross et al.           | <i>Optimizing information technology to improve sexual health-care delivery: public and patient preferences</i>                                                                                                                      | 2011 | Not key population                             |
| Roth et al.           | <i>Future chlamydia screening preferences of men attending a sexually transmissible infection clinic</i>                                                                                                                             | 2011 | Not key population                             |
| Schwandt et al.       | <i>Preferences for rapid point-of-care HIV testing in primary care</i>                                                                                                                                                               | 2012 | Not key population                             |
| Shultz et al.         | <i>Patient Preferences for Test Result Notification</i>                                                                                                                                                                              | 2015 | Not key population                             |
| Smith et al.          | <i>Client satisfaction with rapid HIV testing: comparison between an urban sexually transmitted disease clinic and a community-based testing center</i>                                                                              | 2006 | Not key population                             |
| Smith et al.          | <i>Mobile sexual health services for adolescents: investigating the acceptability of youth-directed mobile clinic services in Cape Town, South Africa</i>                                                                            | 2019 | Not from high-income country                   |
| Spielberg et al.      | <i>Fully Integrated e-Services for Prevention, Diagnosis, and Treatment of Sexually Transmitted Infections: Results of a 4-County Study in California</i>                                                                            | 2014 | Not key population                             |
| Steedman et al.       | <i>TELEPHONETICS RESULTS computer-facilitated telephone system: a novel method for patient results retrieval</i>                                                                                                                     | 2007 | Not key population                             |

|                     |                                                                                                                                                                                                             |      |                            |
|---------------------|-------------------------------------------------------------------------------------------------------------------------------------------------------------------------------------------------------------|------|----------------------------|
| Su et al.           | <i>Why are men less tested for sexually transmitted infections in remote Australian Indigenous communities?</i>                                                                                             | 2016 | Not key population         |
| Syred et al.        | <i>Choose to test: self-selected testing for sexually transmitted infections within an online service. Sexually transmitted infections.</i>                                                                 | 2019 | Not related to preferences |
| Town et al.         | <i>Service evaluation of an educational intervention to improve sexual health services in primary care implemented using a step-wedge design: analysis of chlamydia testing and diagnosis rate changes.</i> | 2016 | Not related to preferences |
| Town et al.         | <i>Supporting general practices to provide sexual and reproductive health services: Protocol for the 3Cs &amp; HIV programme</i>                                                                            | 2015 | Not related to preferences |
| Watson et al.       | <i>Valuing experience factors in the provision of Chlamydia screening: an application to women attending the family planning clinic.</i>                                                                    | 2019 | Not key population         |
| Wayal et al.        | <i>Association between knowledge, risk behaviours, and testing for sexually transmitted infections among men who have sex with men: findings from a large online survey in the United Kingdom</i>           | 2019 | Not related to preferences |
| Wood et al.         | <i>Pharmacist-led screening in sexually transmitted infections: Current perspectives</i>                                                                                                                    | 2018 | No primary data            |
| Yoshida et al.      | <i>Comparison of free and anonymous testing for HIV and sexually transmitted infections between the University Hospital and Health Center</i>                                                               | 2012 | Not key population         |
| Youssef et al.      | <i>Understanding HIV-positive patients' preferences for healthcare services: a protocol for a discrete choice experiment.</i>                                                                               | 2016 | Not key population         |
| Rawitscher, et al   | <i>Adolescents' preferences regarding human immunodeficiency virus (HIV)-related physician counseling and HIV testing</i>                                                                                   | 1995 | Published prior to 2000    |
| Bauermeister et al. | <i>Acceptability and Preliminary Efficacy of a Tailored Online HIV/STI Testing Intervention for Young Men who have Sex with Men: The Get Connected! Program</i>                                             | 2018 | Not related to preferences |
| Gutierrez et al.    | <i>Acceptability and effectiveness of using mobile applications to promote HIV and other STI testing among men who have sex with men in Barcelona, Spain</i>                                                | 2018 | Not key population         |
| Balan et al.        | <i>Fingerprick Versus Oral Swab: Acceptability of Blood-Based Testing Increases If Other STIs Can Be Detected</i>                                                                                           | 2017 | Not key population         |
| Balan et al.        | <i>SMARTtest: A Smartphone App to Facilitate HIV and Syphilis Self- and Partner-Testing, Interpretation of Results, and Linkage to Care</i>                                                                 | 2020 | Not key population         |
| Bauermeister et al. | <i>Acceptability and Preliminary Efficacy of a Tailored Online HIV/STI Testing Intervention for Young Men who have Sex with Men: The Get Connected! Program</i>                                             | 2015 | Not key population         |
| Chen et al.         | <i>Australian men who have sex with men prefer rapid oral HIV testing over conventional blood testing for HIV</i>                                                                                           | 2010 | Not key population         |
| Clark et al.        | <i>Men Who Have Sex with Men (MSM) Who Have Not Previously Tested for HIV: Results from the MSM Testing Initiative, United States (2012-2015)</i>                                                           | 2019 | Not key population         |
| Conway et al.       | <i>Rapid HIV Testing Is Highly Acceptable and Preferred among High-Risk Gay And Bisexual Men after Implementation in Sydney Sexual Health Clinics</i>                                                       | 2015 | Not key population         |
| Cushman et al.      | <i>Attitudes and preferences regarding the use of rapid self-testing for sexually transmitted infections and HIV in San Diego area men who have sex with men</i>                                            | 2019 | Not key population         |
| Datta et al.        | <i>Places and people: the perceptions of men who have sex with men concerning STI testing: a qualitative study</i>                                                                                          | 2018 | Not key population         |

|                  |                                                                                                                                                                                                                        |      |                    |
|------------------|------------------------------------------------------------------------------------------------------------------------------------------------------------------------------------------------------------------------|------|--------------------|
| den Daas et al.  | <i>Reducing health disparities: key factors for successful implementation of social network testing with HIV self-tests among men who have sex with men with a non-western migration background in the Netherlands</i> | 2019 | Not key population |
| Dodge et al.     | <i>Field collection of rectal samples for sexually transmitted infection diagnostics among men who have sex with men</i>                                                                                               | 2010 | Not key population |
| Flowers et al.   | <i>Preparedness for use of the rapid result HIV self-test by gay men and other men who have sex with men (MSM): a mixed methods exploratory study among MSM and those involved in HIV prevention and care</i>          | 2017 | Not key population |
| Gilbert et al.   | <i>Factors associated with intention to use internet-based testing for sexually transmitted infections among men who have sex with men</i>                                                                             | 2013 | Not key population |
| Gilbert et al.   | <i>Differences in experiences of barriers to STI testing between clients of the internet-based diagnostic testing service GetCheckedOnline.com and an STI clinic in Vancouver, Canada</i>                              | 2019 | Not key population |
| Gu et al.        | <i>Psychological factors in association with uptake of voluntary counselling and testing for HIV among men who have sex with men in Hong Kong</i>                                                                      | 2011 | Not key population |
| Heijman, et al.  | <i>Motives and barriers to safer sex and regular STI testing among MSM soon after HIV diagnosis</i>                                                                                                                    | 2017 | Not key population |
| Holt et al.      | <i>Gay men's perceptions of sexually transmissible infections and their experiences of diagnosis: 'Part of the way of life' to feeling 'dirty and ashamed'</i>                                                         | 2010 | Not key population |
| Hottes et al.    | <i>Internet-based HIV and sexually transmitted infection testing in British Columbia, Canada: opinions and expectations of prospective clients</i>                                                                     | 2012 | Not key population |
| Hoyos et al.     | <i>Preferred HIV testing services and programme characteristics among clients of a rapid HIV testing programme</i>                                                                                                     | 2013 | Not key population |
| Katz et al.      | <i>HIV Self-testing increases HIV testing frequency in high-risk men who have sex with men: A randomized controlled trial</i>                                                                                          | 2018 | Not key population |
| Knight et al.    | <i>Qualitative analysis of the experiences of gay, bisexual and other men who have sex with men who use GetCheckedOnline.com: a comprehensive internet-based diagnostic service for HIV and other STIs</i>             | 2019 | Not key population |
| Knight et al.    | <i>Implementation and Operational Research: Convenient HIV Testing Service Models Are Attracting Previously Untested Gay and Bisexual Men: A Cross-sectional Study</i>                                                 | 2015 | Not key population |
| Knussen et al.   | <i>The acceptability of health service and community-based venues for syphilis testing amongst men who have sex with men: The views of potential service users in Scotland</i>                                         | 2008 | Not key population |
| Lea et al.       | <i>Barriers to accessing hiv and sexual health services among gay men in tasmania, australia</i>                                                                                                                       | 2019 | Not key population |
| Lechuga et al.   | <i>Marketing the HIV test to MSM: ethnic differences in preferred venues and sources</i>                                                                                                                               | 2013 | Not key population |
| Lee et al.       | <i>Men who have sex with men prefer rapid testing for syphilis and may test more frequently using it</i>                                                                                                               | 2010 | Not key population |
| Leitinger et al. | <i>Acceptability and HIV prevention benefits of a peer-based model of rapid point of care HIV testing for Australian gay, bisexual and other men who have sex with men</i>                                             | 2018 | Not key population |
| Llewellyn et al. | <i>Are home sampling kits for sexually transmitted infections acceptable among men who have sex with men?</i>                                                                                                          | 2009 | Not key population |



|                  |                                                                                                                                                                                                                                               |      |                    |
|------------------|-----------------------------------------------------------------------------------------------------------------------------------------------------------------------------------------------------------------------------------------------|------|--------------------|
| Martin et al.    | <i>Clients' preferred methods of obtaining sexually transmissible infection or HIV results from Sydney Sexual Health Centre</i>                                                                                                               | 2013 | Not key population |
| Maxwell, S.      | <i>General Practitioners' views and experiences on the barriers and facilitators that men who have sex with men have when accessing primary care for HIV testing and sexual health screening</i>                                              | 2018 | Not key population |
| Medline et al.   | <i>HIV Testing Preferences Among MSM Members of an LGBT Community Organization in Los Angeles</i>                                                                                                                                             | 2017 | Not key population |
| Miners et al.    | <i>Preferences for HIV testing services among men who have sex with men in the UK: A discrete choice experiment</i>                                                                                                                           | 2019 | Not key population |
| Pant Pai et al.  | <i>An Unsupervised Smart App-Optimized HIV Self-Testing Program in Montreal, Canada: Cross-Sectional Study</i>                                                                                                                                | 2018 | Not key population |
| Pollard et al.   | <i>Opt-out testing for HIV: Perspectives from a high prevalence community in south-east England, UK</i>                                                                                                                                       | 2013 | Not key population |
| Reed et al.      | <i>Community event-based outreach screening for syphilis and other sexually transmissible infections among gay men in Sydney, Australia</i>                                                                                                   | 2013 | Not key population |
| Ryan et al.      | <i>Trial and error: evaluating and refining a community model of HIV testing in Australia</i>                                                                                                                                                 | 2017 | Not key population |
| Schein et al.    | <i>Barriers and facilitators to HIV and sexually transmitted infections testing for gay, bisexual, and other transgender men who have sex with men</i>                                                                                        | 2017 | Not key population |
| Skolnik et al.   | <i>Deciding where and how to be tested for HIV: what matters most?</i>                                                                                                                                                                        | 2001 | Not key population |
| Spielberg et al. | <i>Overcoming barriers to HIV testing: Preferences for new strategies among clients of a needle exchange, a sexually transmitted disease clinic, and sex venues for men who have sex with men</i>                                             | 2003 | Not key population |
| Strömdahl et al. | <i>HIV testing and prevention among foreign-born Men Who have Sex with Men: an online survey from Sweden</i>                                                                                                                                  | 2017 | Not key population |
| Sun et al.       | <i>Acceptability and Feasibility of Using Established Geosocial and Sexual Networking Mobile Applications to Promote HIV and STD Testing Among Men Who Have Sex with Men</i>                                                                  | 2015 | Not key population |
| Tobin et al.     | <i>Acceptability and feasibility of a Peer Mentor program to train young Black men who have sex with men to promote HIV and STI home-testing to their social network members</i>                                                              | 2018 | Not key population |
| Wayal et al.     | <i>Home sampling kits for sexually transmitted infections: preferences and concerns of men who have sex with men</i>                                                                                                                          | 2011 | Not key population |
| Witzel et al.    | <i>HIV self-testing intervention experiences and kit usability: results from a qualitative study among men who have sex with men in the SELHPI (Self-Testing Public Health Intervention) randomized controlled trial in England and Wales</i> | 2019 | Not key population |
| Witzel et al.    | <i>HIV testing history and preferences for future tests among gay men, bisexual men and other MSM in England: results from a cross-sectional study</i>                                                                                        | 2016 | Not key population |
| Witzel et al.    | <i>HIV Self-Testing among Men Who Have Sex with Men (MSM) in the UK: A Qualitative Study of Barriers and Facilitators, Intervention Preferences and Perceived Impacts</i>                                                                     | 2016 | Not key population |

|                   |                                                                                                                                                                                |      |                    |
|-------------------|--------------------------------------------------------------------------------------------------------------------------------------------------------------------------------|------|--------------------|
| Wohlfeiler et al. | <i>How can we improve online HIV and STD prevention for men who have sex with men? Perspectives of hook-up website owners, website users, and HIV/STD directors</i>            | 2013 | Not key population |
| Wray et al.       | <i>A pilot, randomized controlled trial of HIV self-testing and real-time post-test counseling/referral on screening and preventative care among men who have sex with men</i> | 2018 | Not key population |
